# Supplementary material
Source: HighWire-hosted journal article supplement (https://ijgc.bmj.com/highwire/filestream/26287/field_highwire_adjunct_files/0/ijgc-2022-003462supp001_data_supplement.pdf)
Supplement: ijgc-2022-003462supp001_data_supplement.pdf [file ijgc-2022-003462supp001_data_supplement.pdf]

**INSTRUMENTS FOR VAGINAL RADICAL TRACHELECTOMY:**

Long medical tweezers

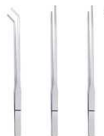

6 Kocher clamps

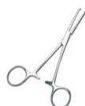

Syringe with long needle for adrenaline serum injection

Scalpel

6 Krobach tissue clamps

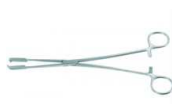

Fine scissors for dissection

2 Jean Louis Faure forceps

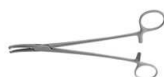

Bipolar coagulation forcep

Lane tissue forceps

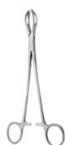

2 Haeney forceps

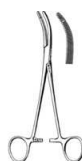

Ligature-clamp dissector

Cervical dilator Hegar 4

Needle port

Cerclage : Mersilene 6/0

Threads: Vicryl 2/0 (Douglas pouch) and Vicryl 1/0 (vaginal closure)
